# Supplementary material for: Towards identifying the mode of action of drugs using live-cell FTIR spectroscopy
Source: Royal Society of Chemistry journal article supplement (doi:10.1039/c8an02218f), 2019-01-01
Supplement: c8an02218f1.pdf [file c8an02218f1.pdf]

## Identifying the mode of action of drugs using live-cell FTIR spectroscopy

Ali Altharawi, Khondaker Miraz Rahman and K. L. Andrew Chan\*

e-mail: [ka\\_lung.chan@kcl.ac.uk](mailto:ka_lung.chan@kcl.ac.uk)

School of Cancer and Pharmaceutical Science, King's College London, SE1 9NH, UK

### Supplementary:

#### A) Time (0 hr)

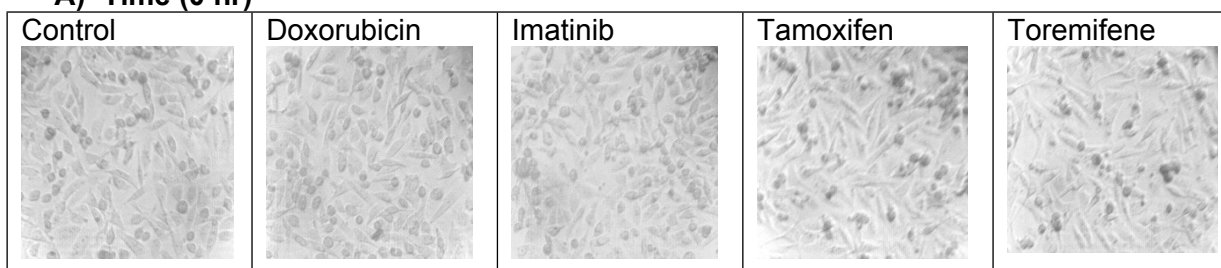

#### B) Time (2<sup>nd</sup> hr)

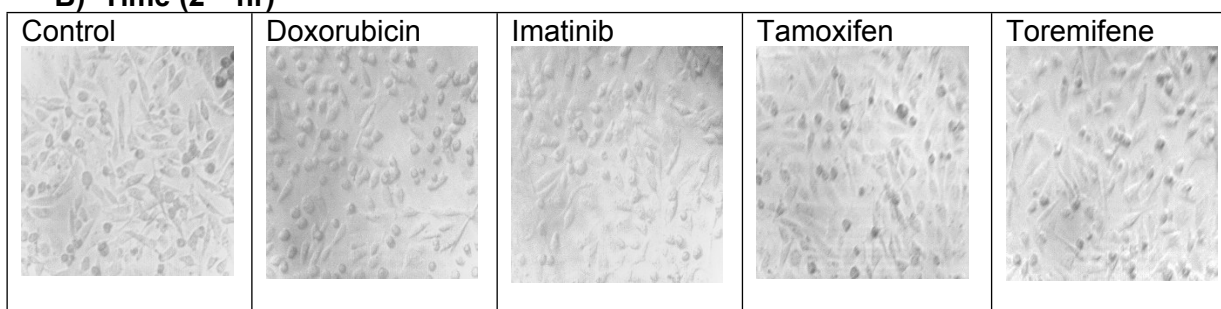

#### C) Time (4<sup>th</sup> hr)

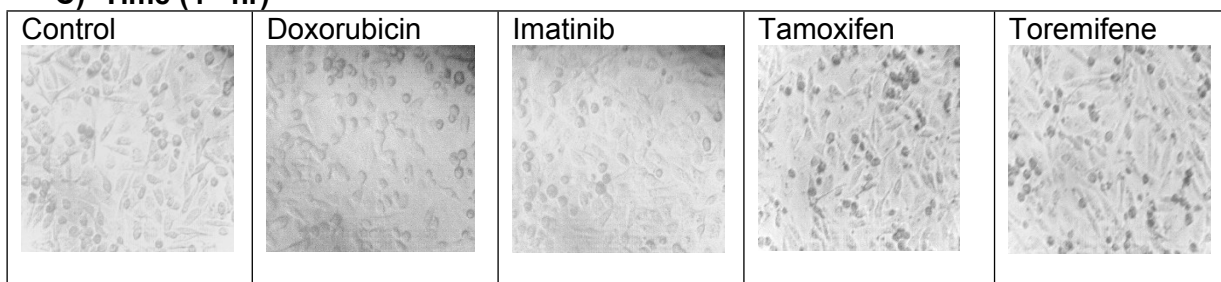

#### D) Time (6<sup>th</sup> hr)

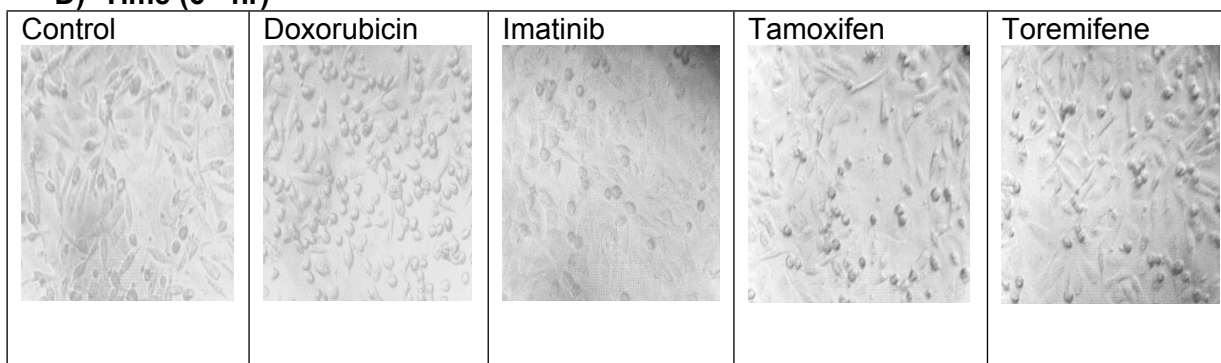

### E) Time (24<sup>th</sup> hr)

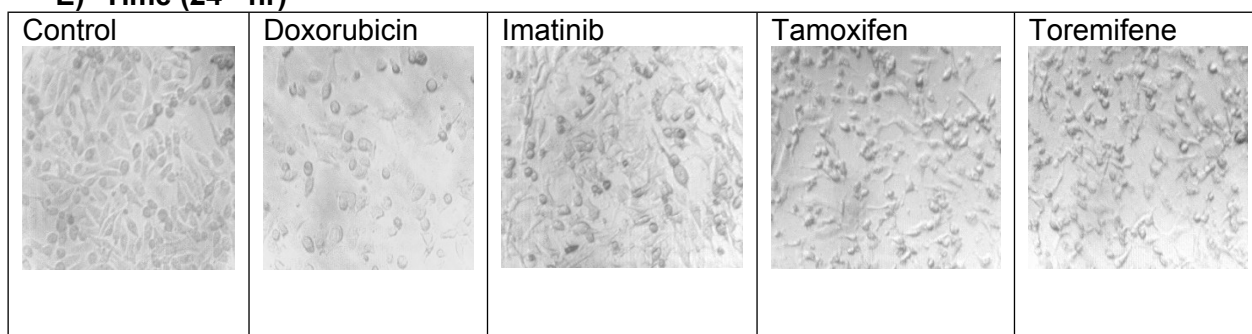

**Figure 1:** Visible images of live MDA-MB-231 cells attached to ZnS ATR crystal before the exposure to 0.1% DMSO (Control) and IC<sub>50</sub> of tamoxifen, toremifene, imatinib and doxorubicin (time 0, A). Visible images in (B), (C), (D) and (E) show cells after the addition of 0.1% DMSO and drugs in the 2<sup>nd</sup>, 4<sup>th</sup>, 6<sup>th</sup>, and 24<sup>th</sup> hr, respectively.

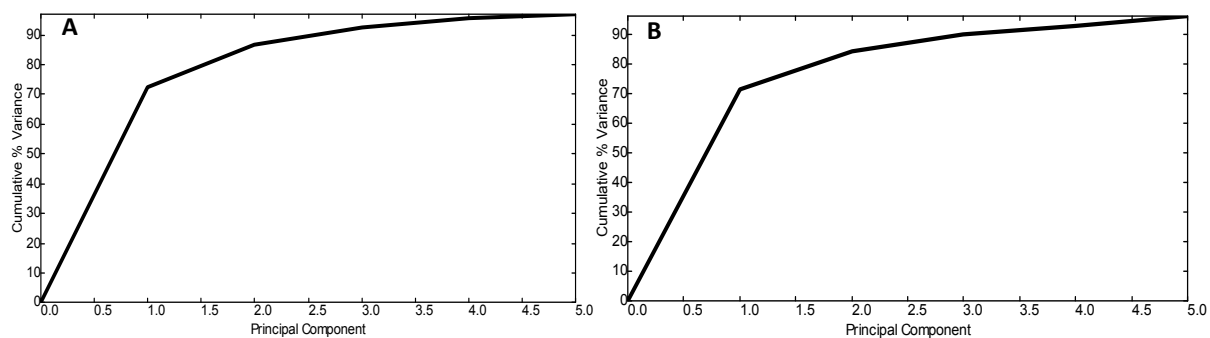

**Figure 2:** Percentage variance explained as function of the number of principal components of vector normalised difference spectra of live MDA-MB-231 cells for the 6<sup>th</sup> hr exposure to IC<sub>50</sub> (A) and 50% IC<sub>50</sub> (B).

**A** 2nd HR Control

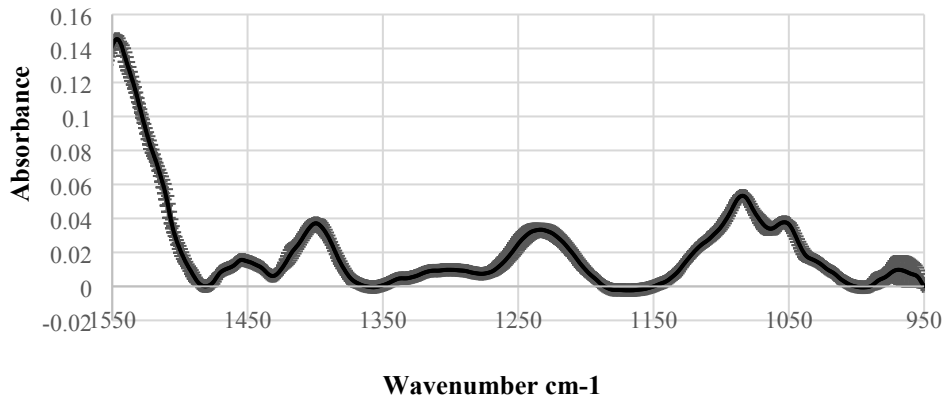

4th HR Control

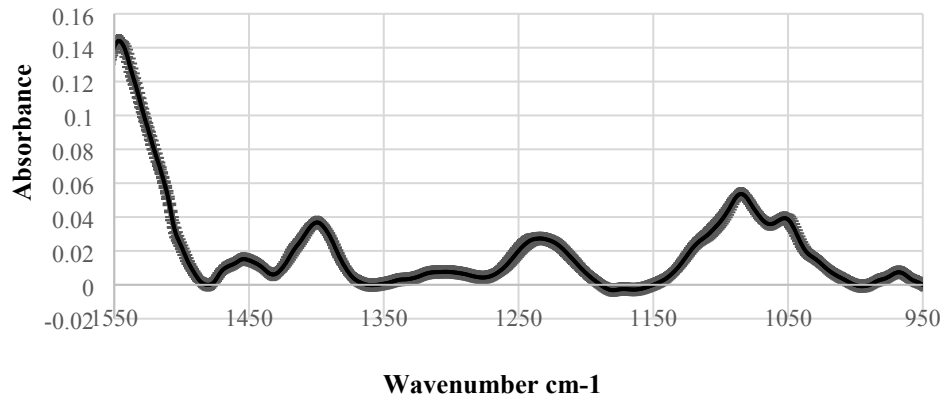

6th HR Control

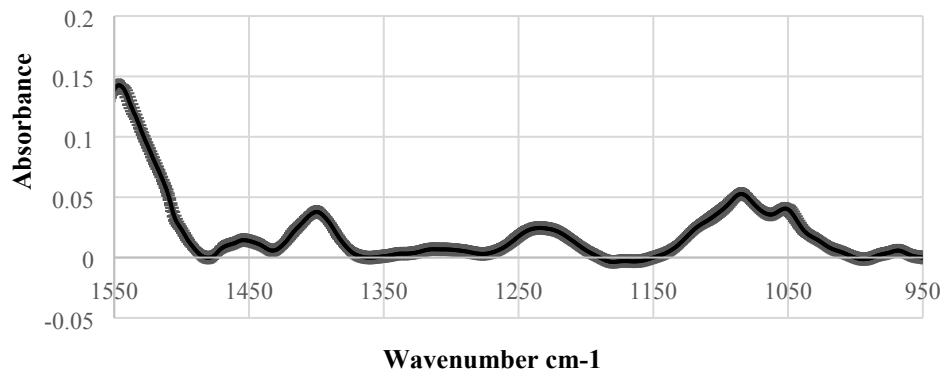

**B** 2nd HR TM at IC50

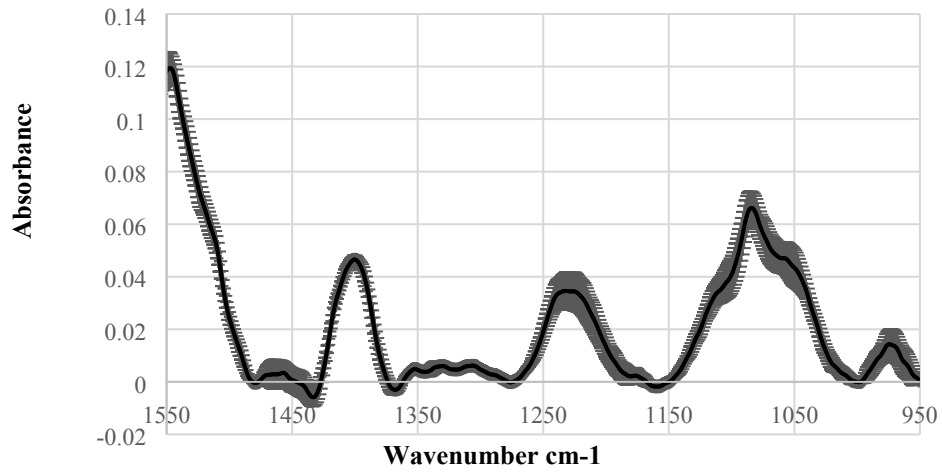

4th HR TM at IC50

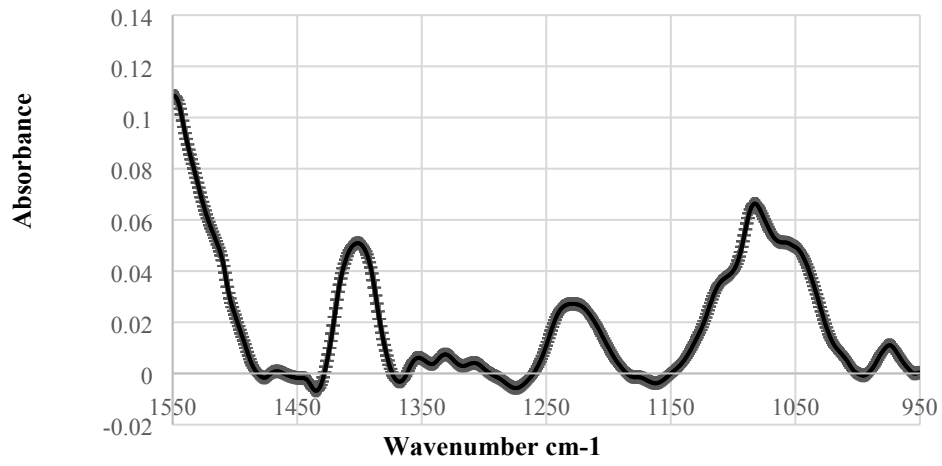

6th HR TM at IC50

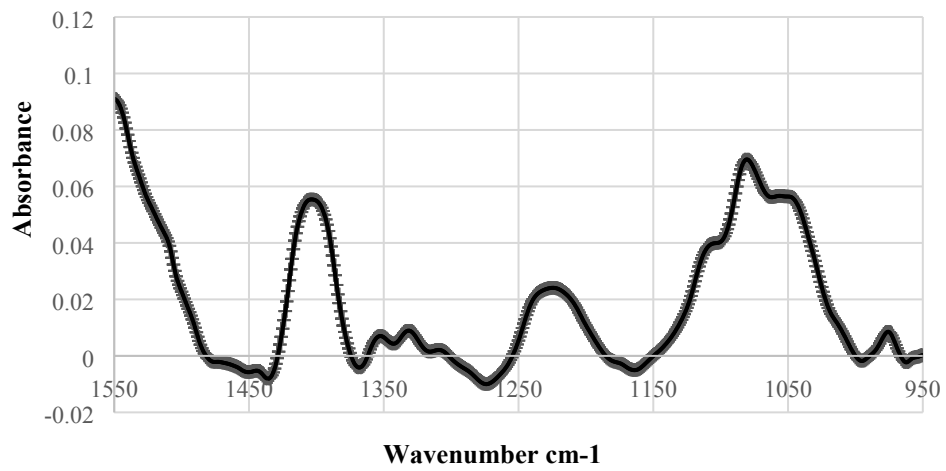

**C** 2nd HR TR at IC50

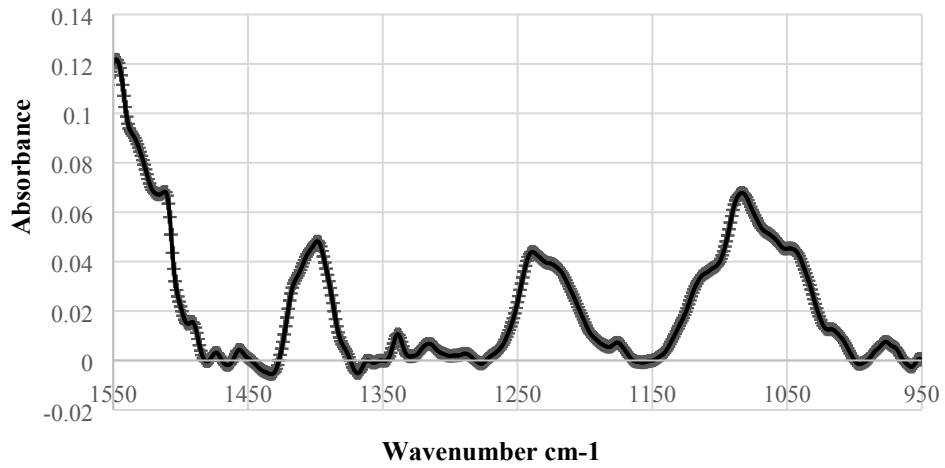

4th HR TR at IC50

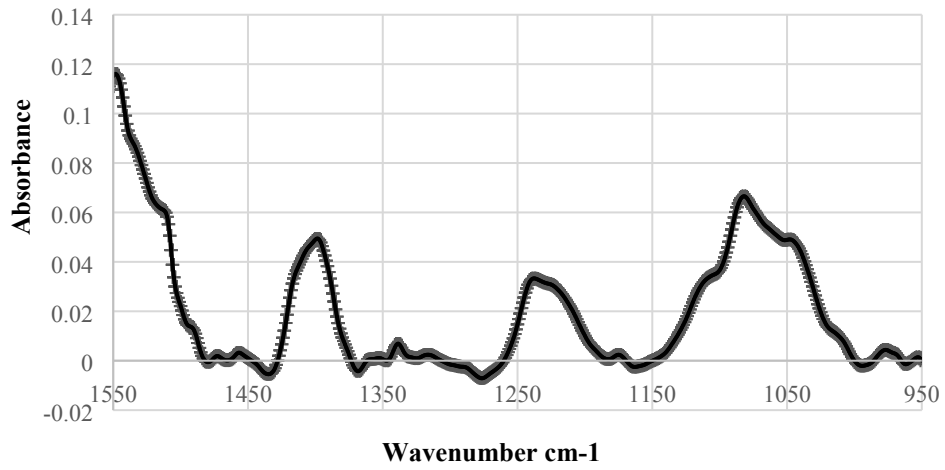

6th HR TR at IC50

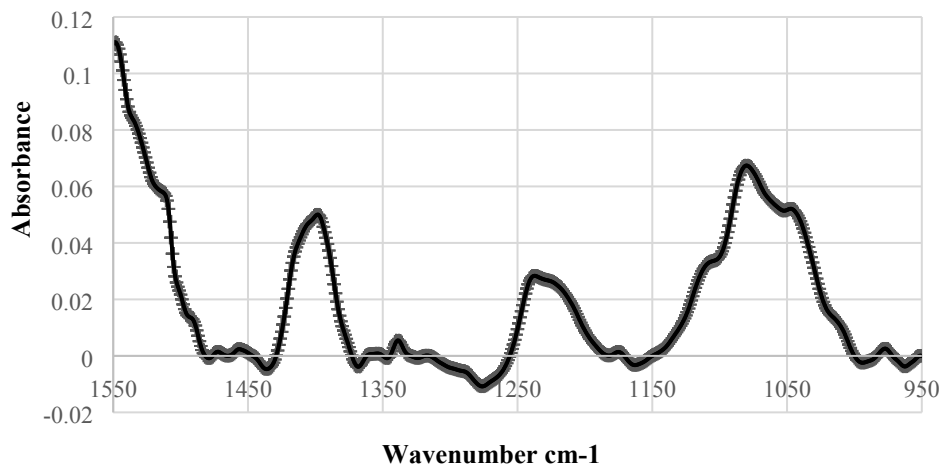

**D** 2nd HR IM at IC50

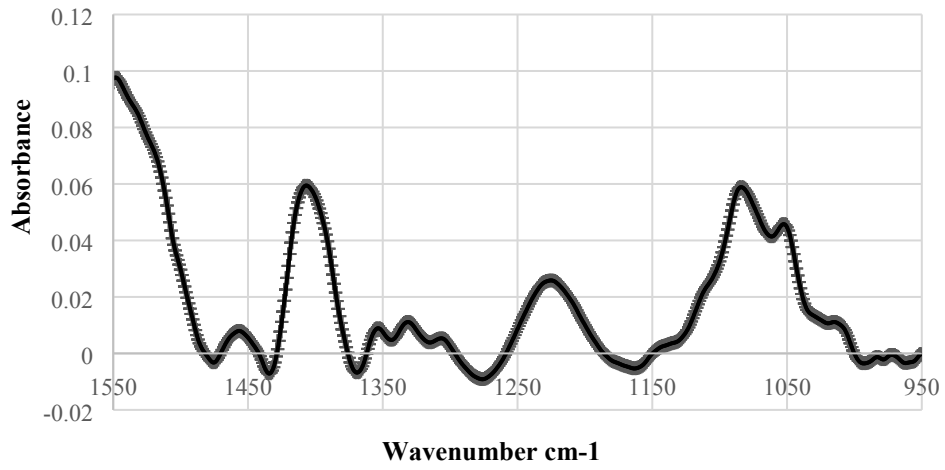

4th HR IM at IC50

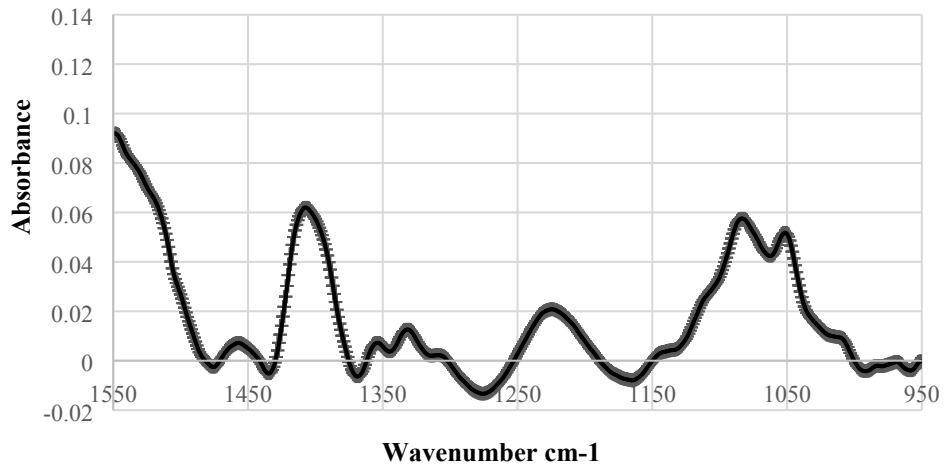

6th HR IM at IC50

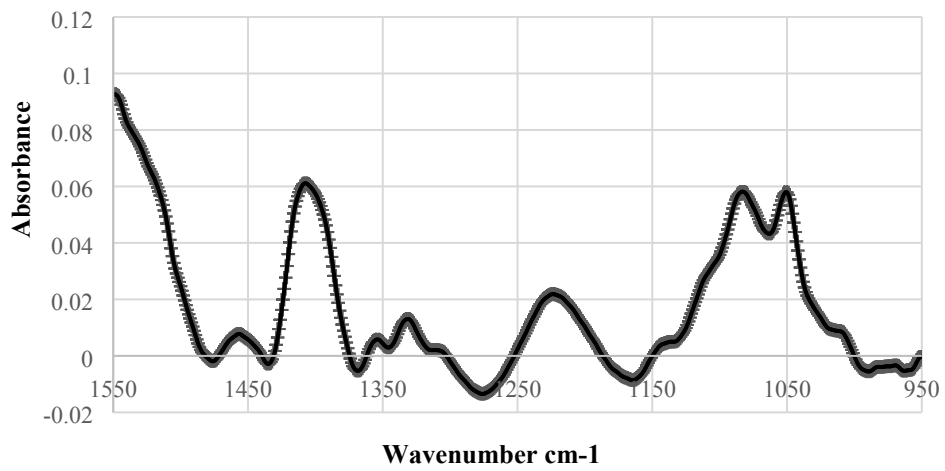

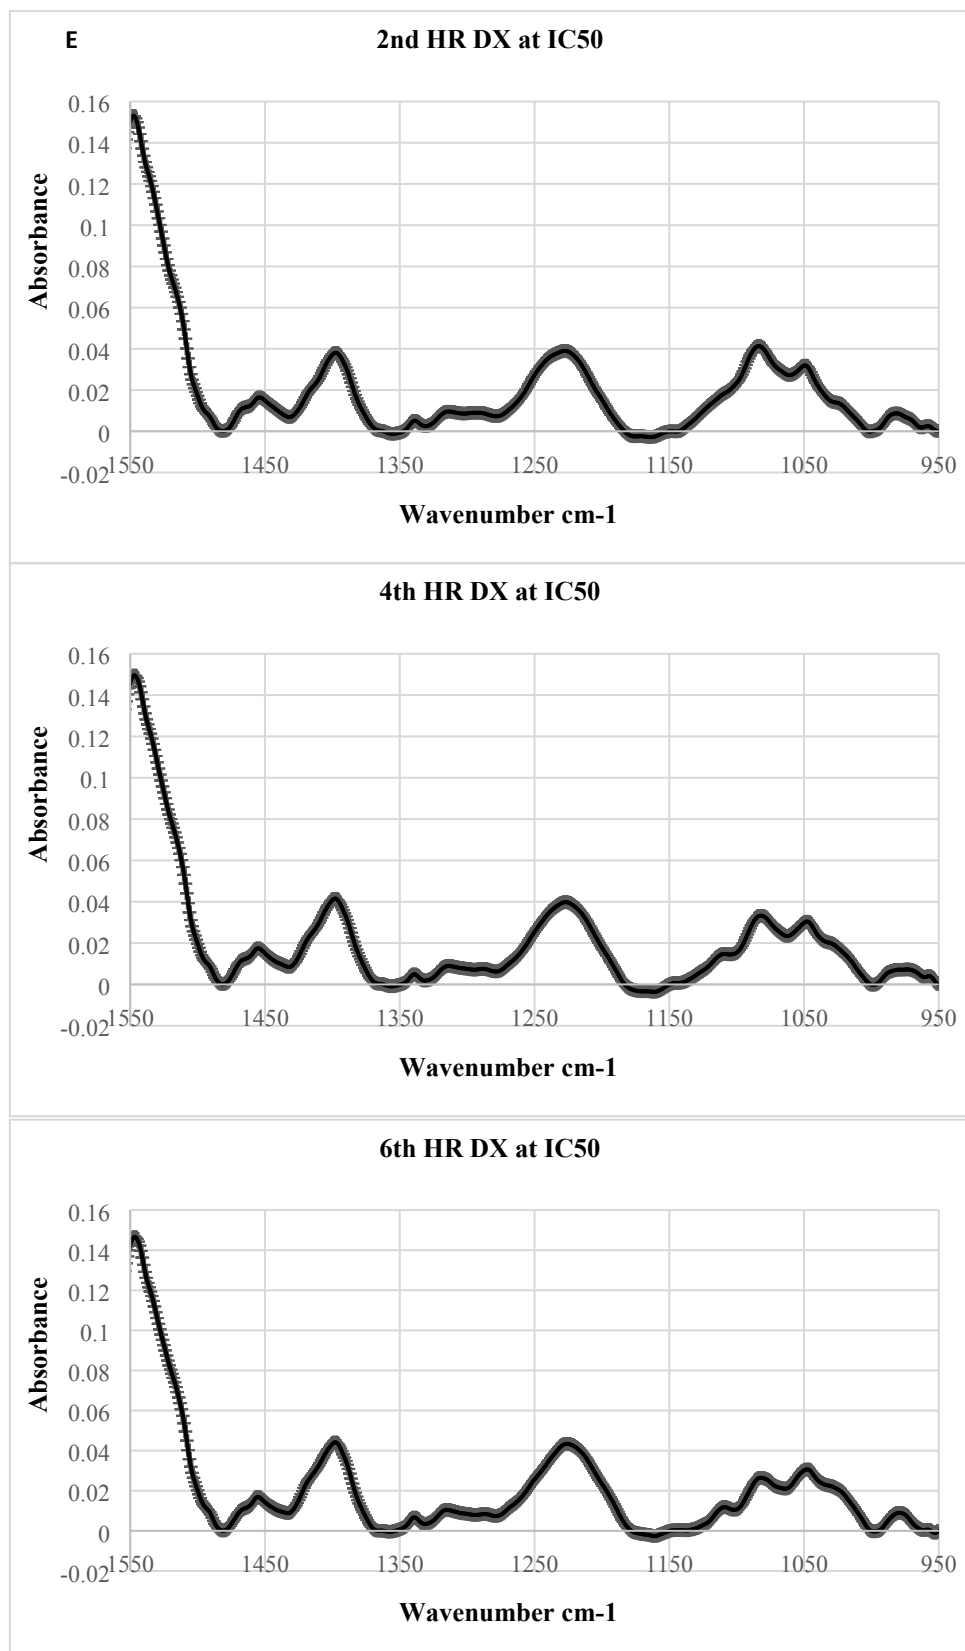

**Figure 3:** FTIR vector normalised difference spectra of live MDA-MB-231 cells after exposure to 0.1% DMSO (drug vehicle; control(A)) and IC50 of tamoxifen (B), toremifene (C), imatinib (D) and doxorubicin (E) for 2, 4 and 6 hours. The average spectra of three repeated measurements are presented in (Black line) with error bars shown in (Grey).

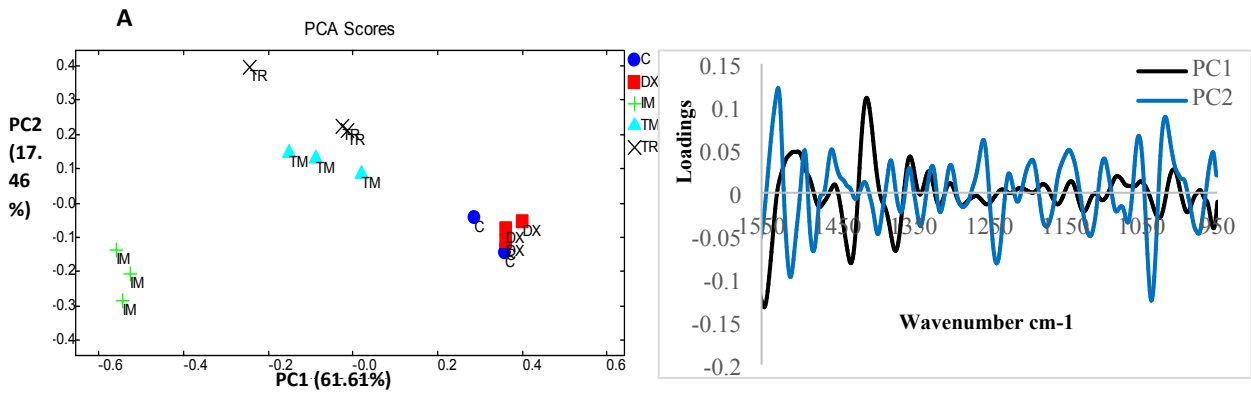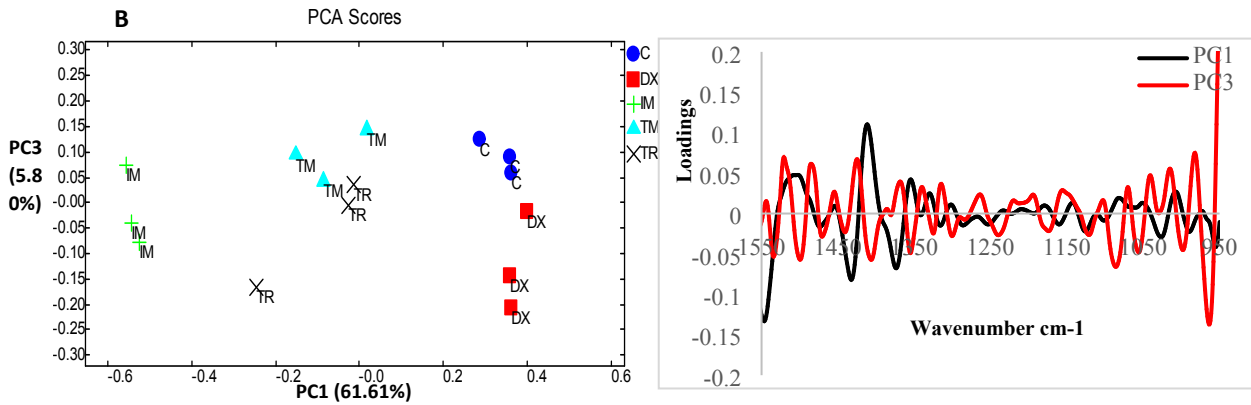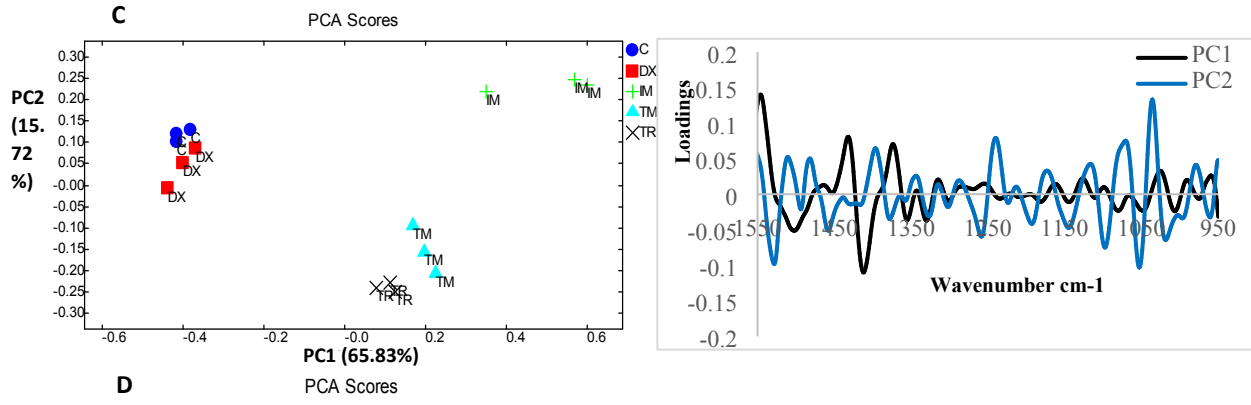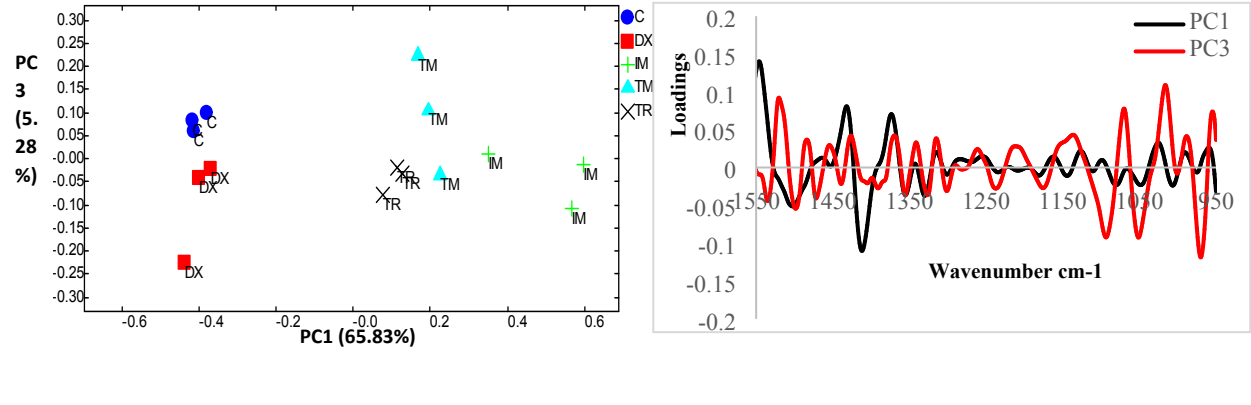



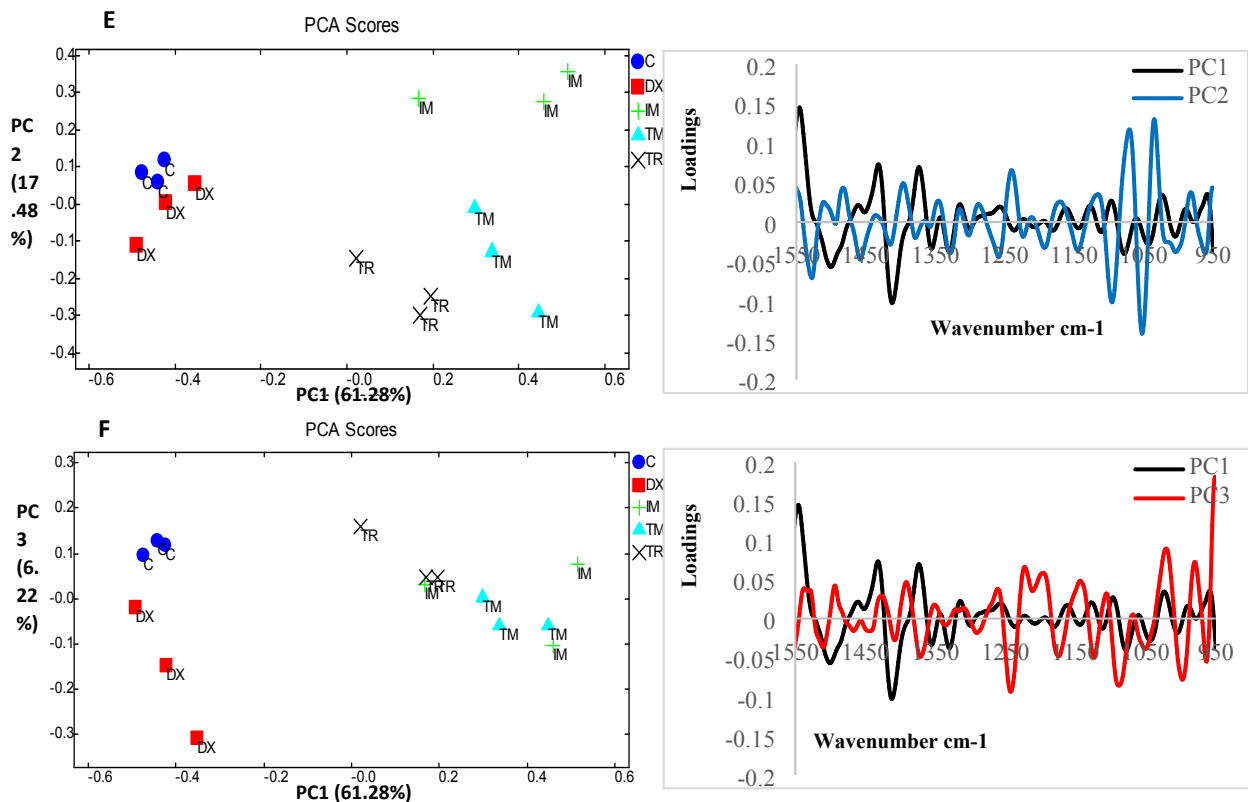

**Figure 4:** PCA score and its corresponding loading of FTIR vector normalised 2<sup>nd</sup> derivative difference spectra of live MDA-MB-231 cells after exposure to 0.1% DMSO (control) and IC50 of tamoxifen (TM), toremifene (TR), imatinib (IM) and doxorubicin (DX) in the 2<sup>nd</sup> hr (A and B), 4<sup>th</sup> hr (C and D) and 6<sup>th</sup> hr (E and F).

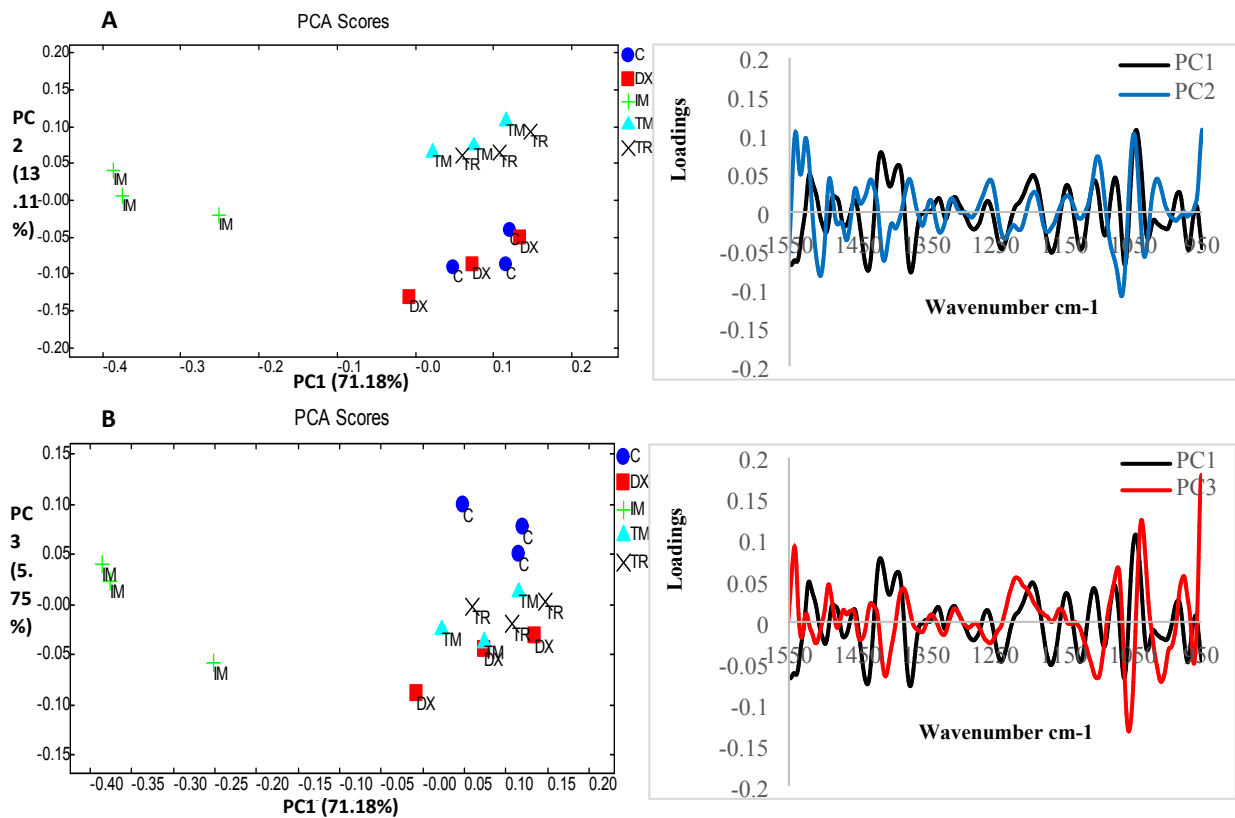

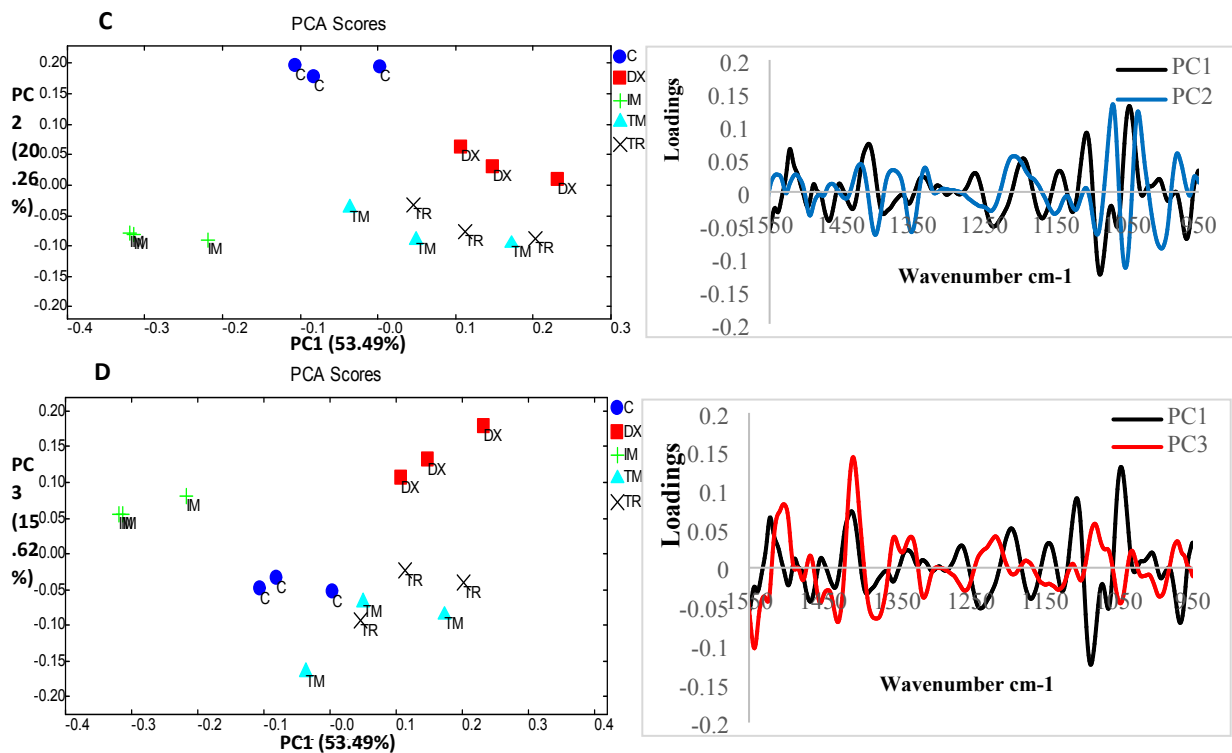

**Figure 5:** PCA score and its corresponding loading of FTIR vector normalised 2<sup>nd</sup> derivative difference spectra of live MDA-MB-231 cells after exposure to 0.1% DMSO (control) and 50% IC50 of tamoxifen (TM), toremifene (TR), imatinib (IM) and doxorubicin (DX) in the 6<sup>th</sup> hr (A and B), 24<sup>th</sup> hr (C and D).

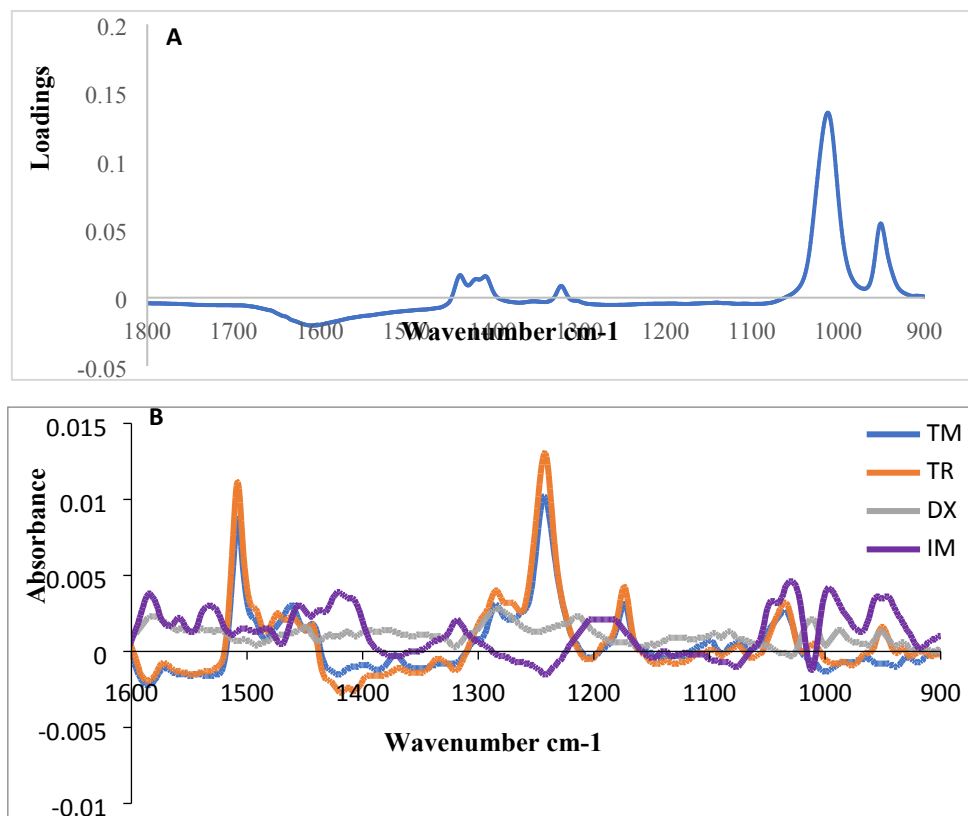

**Figure 6:** FTIR-ATR Spectra of 10% DMSO and (A) and 10 mM of tamoxifen (TM), toremifene (TR), doxorubicin (DX) and imatinib (IM) shown in (B).

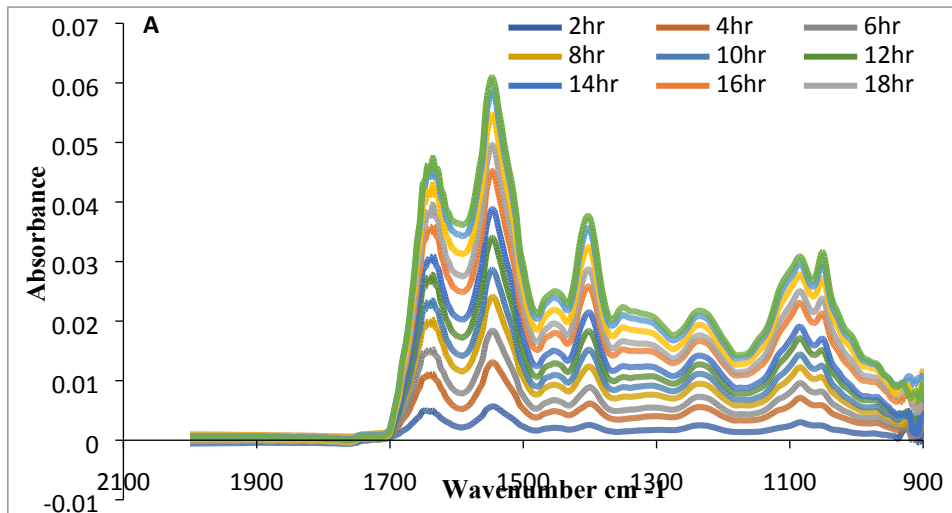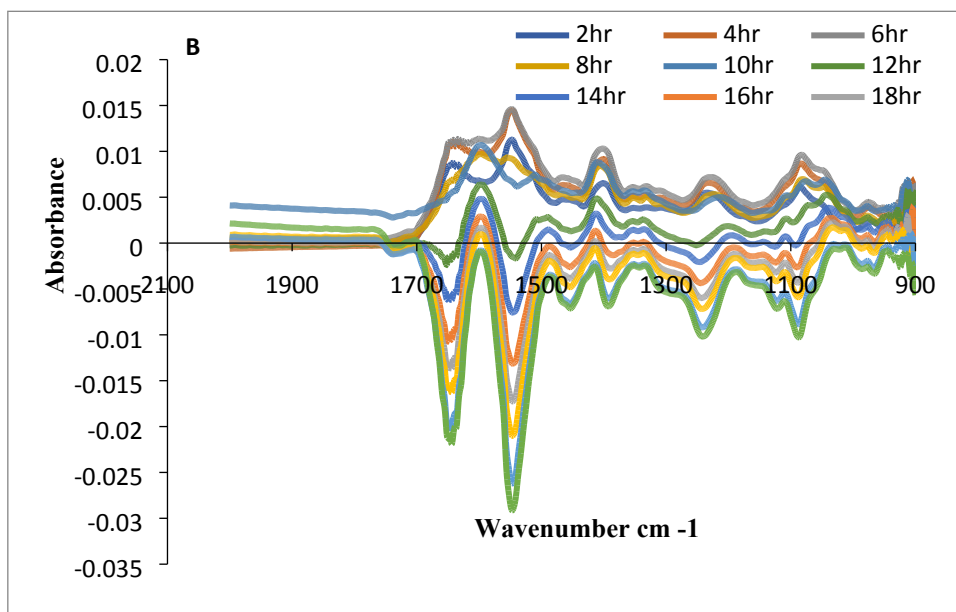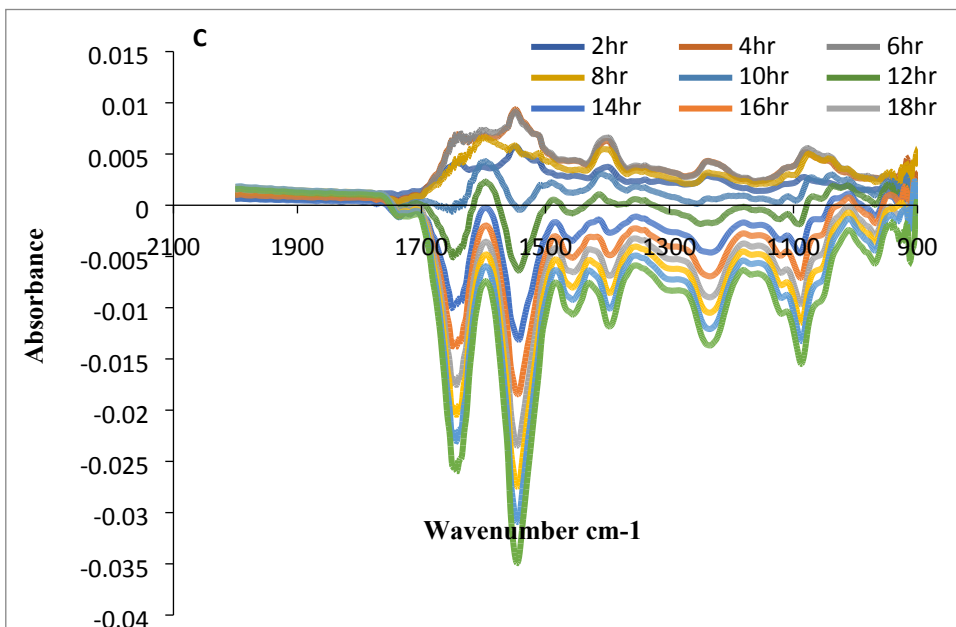

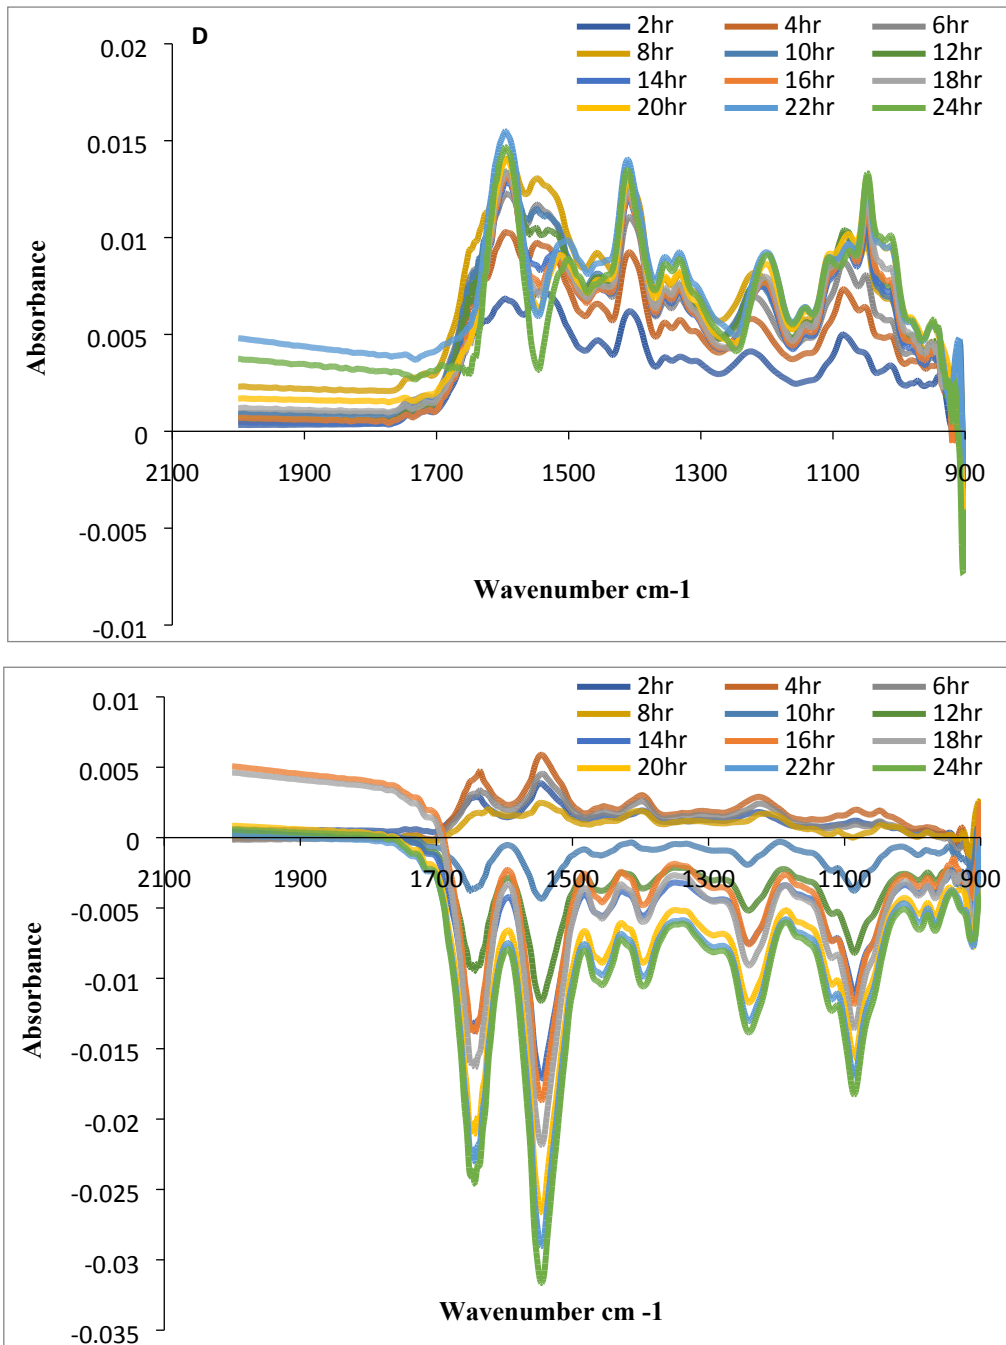

**Figure 7:** ATR-FTIR non-baselined difference spectra of live MDA-MB-231 cells after exposure to 0.1% DMSO (drug vehicle; control(A)) and IC50 of tamoxifen (B), toremifene (C), imatinib (D) and doxorubicin (E) for 24 hours.

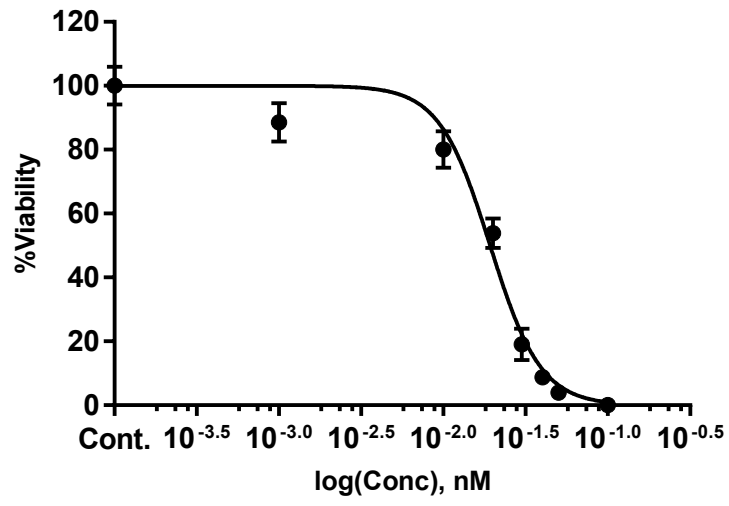

**Figure 8:** Cell Viability Percentage of MDA-MB-231 treated with tamoxifen for 24 hrs.
